# Supplementary material for: Pathobiont-induced suppressive immune imprints thwart T cell vaccine responses
Source: Springer Nature journal article supplement (doi:10.1038/s41467-024-54644-w), 2024-12-16
Supplement: MOESM1 [file 41467_2024_54644_MOESM1_ESM.pdf]

## **Pathobiont-induced suppressive immune imprints thwart T cell vaccine responses**

Irshad Ahmed Hajam<sup>1</sup>, Chih-Ming Tsai<sup>1</sup>, Cesia Gonzalez<sup>1</sup>, Juan Raphael Caldera<sup>1,2</sup>, María Lázaro Díez<sup>1,3</sup>, Xin Du<sup>1</sup>, April Aralar<sup>1</sup>, Brian Lin<sup>1</sup>, William Duong<sup>1</sup>, George Y. Liu<sup>1,4</sup>

<sup>1</sup>Department of Pediatrics, University of California San Diego, San Diego, CA 92093, USA

<sup>2</sup>Quest Diagnostics, 33608 Ortega Hwy., San Juan Capistrano, CA 92675

<sup>3</sup>AIDS Research Institute (IrsiCaixa). VIRus Immune Escape and VACCine Design (VIRIEVAC)  
Universitary Hospital German Trias i Pujol Crta Canyet s/n 08916, Badalona, Barcelona, Spain.

<sup>4</sup>Division of Infectious Diseases, Rady Children's Hospital, San Diego, CA 92123, USA

**Corresponding author:** George Y. Liu ([gyliu@health.ucsd.edu](mailto:gyliu@health.ucsd.edu))

**a) IgG titers**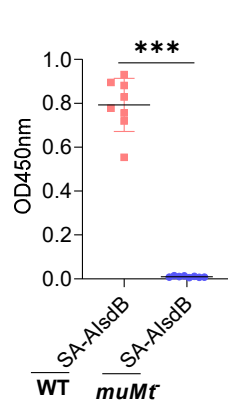**b) *muMt* mice, Alum**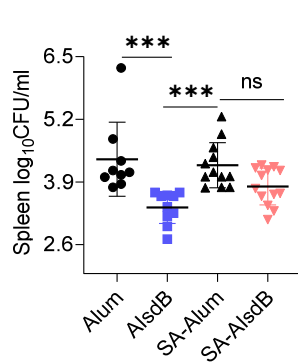**c) CD3<sup>+</sup> T cells transfer**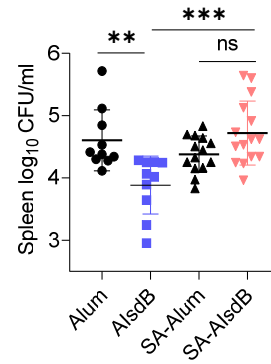**d) 20 h post-SA challenge, D7**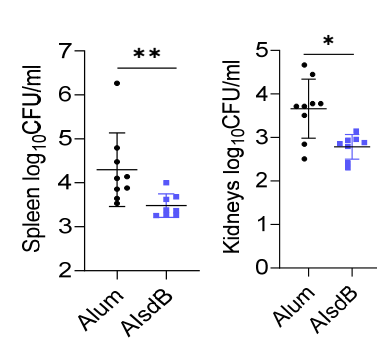**e) 48 h post-SA challenge, D7**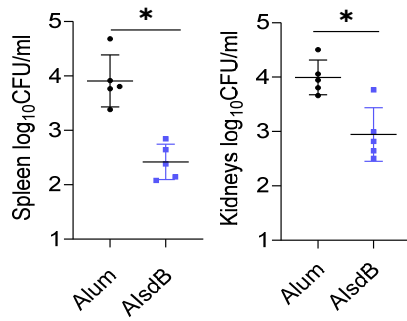**f) 48 h post-SA challenge, Peritoneum, D7**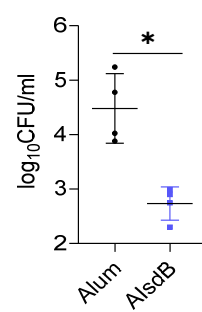**g) Naive, T cells subset depletion**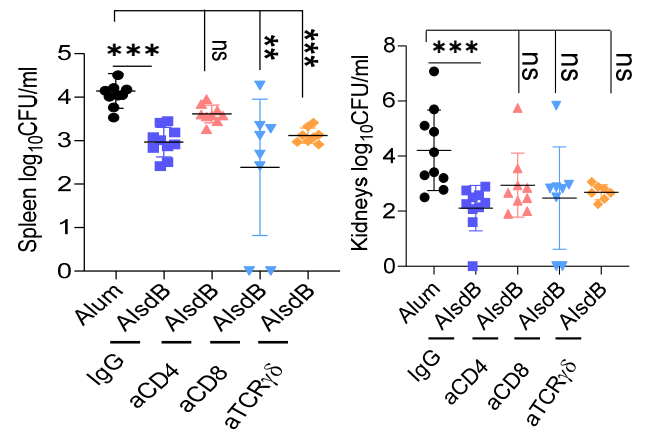**h) *muMt* mice, TLR7**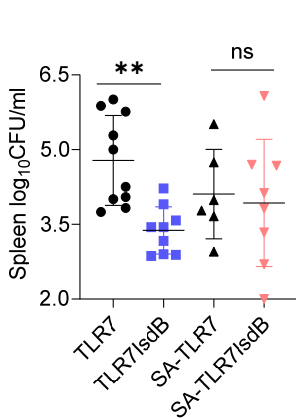**i) SA-CD4<sup>+</sup> T cells transfer + vaccine**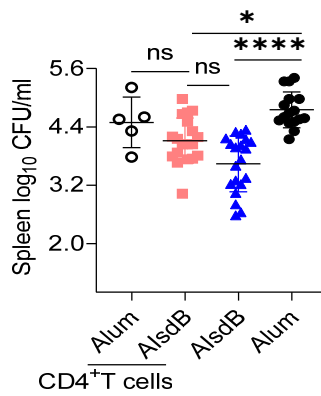**j) CD45.1 or CD45.2 T cells into WT recipient + vaccine**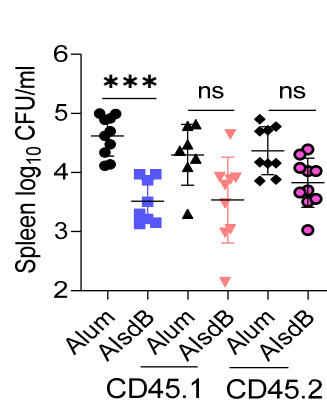

**Supplementary Fig. 1 Prior SA exposure abrogates vaccine-induced protective T cell responses.**

- a) Serum from SA-exposed WT or *muMt* AIsdB vaccinated mice was isolated on 7 dpv and analyzed for IsdB titers by an indirect ELISA (n=8 per group).
- b) Naïve or SA-exposed *muMt* mice were vaccinated with either Alum (n=9 for alum and n=12 for SA-Alum) or AIsdB (n=10 for AIsdB and n=13 for SA-AIsdB), then SA challenged as in **Figure 1a**.
- c) Naïve or SA-exposed WT mice were vaccinated with either Alum (n=10 for alum and n=14 for SA-Alum) or AIsdB (n=10 for AIsdB and n=15 for SA-AIsdB) as in **Figure 1a**. Splenic CD3<sup>+</sup> T cells isolated 14 dpv were adoptively transferred into naïve recipient mice, followed by SA challenge.
- d) Naïve WT mice were vaccinated with either Alum (n=9) or AIsdB (n=8), then SA challenged as in **Figure 1a** (harvest of bacteria 20 h later).
- e-f) Naïve mice were vaccinated with either Alum (n=5 in e and 4 in f) or AIsdB (n=5 in e and 4 in f) as in main **Figure 1a**, then SA challenged. Bacterial burden in spleen, kidneys, and peritoneum at 48 h post SA challenge.
- g) Naïve mice were vaccinated with either Alum (n=10) or AIsdB as in **Figure 1a**, then one day before and on the day of SA challenge, were treated with isotype IgG (n=10), anti-CD4 (n=9), anti-CD8 (n=8) or anti-TCR  $\gamma\delta$  (n=8) antibodies, then challenged with SA.
- h) Naïve or SA-exposed *muMt* mice were vaccinated with either TLR7 alone (n=10 for TLR7 and n=6 for SA-TLR7) or TLR7IsdB (n=9 for TLR7IsdB and n=8 for SA-TLR7), then SA challenged as in **Figure 1a**.
- i) SA-exposed splenic CD4<sup>+</sup> T cells ( $1 \times 10^7$ ) were adoptively transferred into naïve recipient WT mice. One day later, the recipient mice were vaccinated with either Alum (Alum-CD4, n=5; Alum, n=16) or AIsdB (AIsdb-CD4, n=19 and AIsdB, n=20), and challenged with SA as in **Figure 1e**.
- j) SA-exposed splenic CD45.1 CD4<sup>+</sup> T cells ( $1 \times 10^7$ ) were transferred into naïve CD45.2 mice followed by AIsdB vaccination. Then, splenic CD45.1 or CD45.2 CD4<sup>+</sup> T cells were isolated 7 dpv and transferred into naïve recipients, followed by vaccination and SA challenge of the recipients as in main **Figure 1g**. Alum (n=10, 7 and 9 respectively). AIsdB (8, 9, and 10 respectively).

Data were from one to four independent experiments with each data point representing one mouse. The data is presented as mean  $\pm$  SD of biological replicates. The data in **a**, **e-f** were analyzed by two-tailed non-parametric Mann-Whitney T test, while the data in **b-d**, **g-j** were analyzed by Kruskal-Wallis non-parametric one-way ANOVA test. \*p<0.05, \*\*p<0.01, \*\*\*p<0.001, \*\*\*\*p<0.0001. ns-non-significant. D, day. dpv, days post-last vaccination. SA, *Staphylococcus aureus*. WT, wild-type. Source data are provided as Source Data File.

**a)**

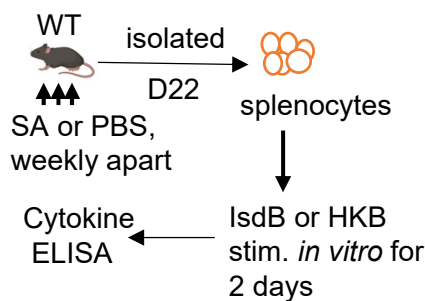

LsdB stim.

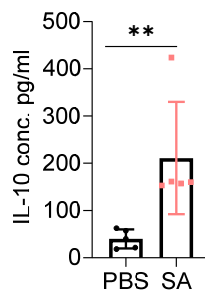

HKB stim.

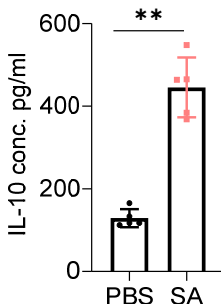

**b)** aIL-10 Ab + vaccine

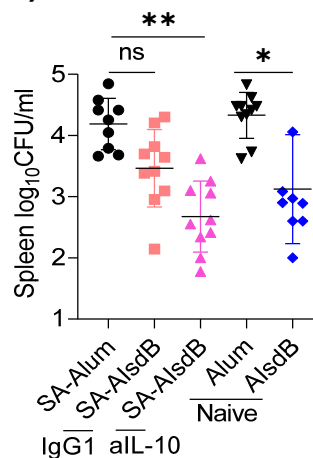

**c)** Gating strategy for IL-10 detection

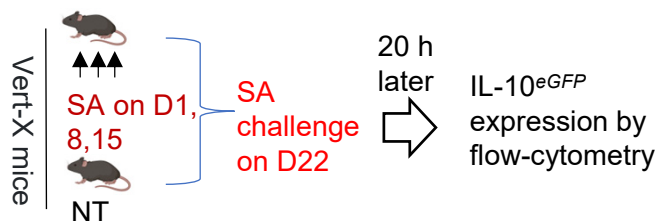

Gating strategy for IL-10 detection in B220<sup>+</sup> B cells

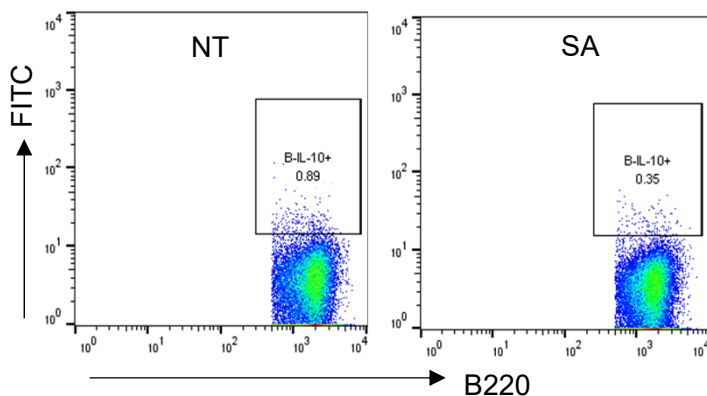

Gating strategy for IL-10 detection in CD3<sup>+</sup> CD4<sup>+</sup> T cells

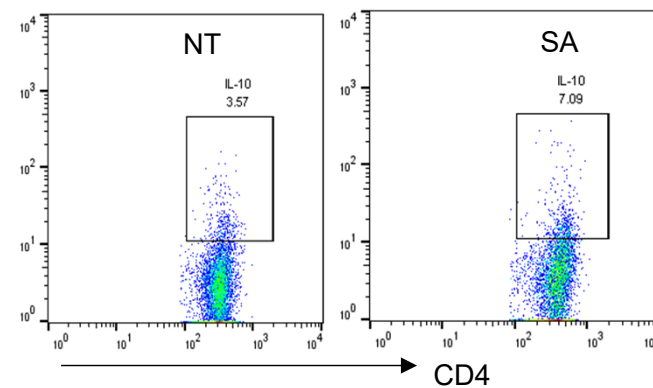

Gating strategy for IL-10 detection in CD3<sup>+</sup> CD4<sup>+</sup> CD69<sup>+</sup> T cells

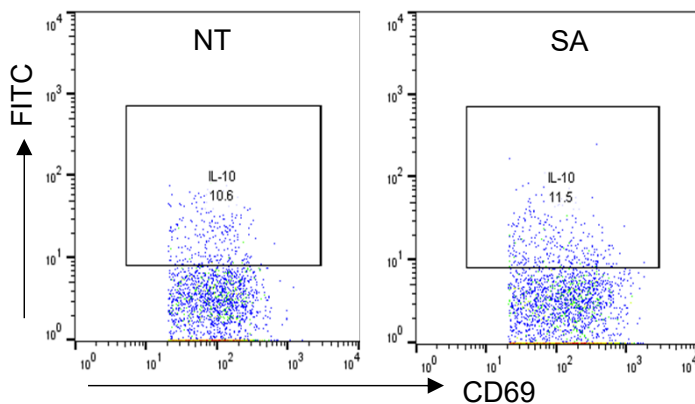

Gating strategy for IL-10 detection in CD3<sup>+</sup> CD4<sup>+</sup> CD25<sup>+</sup> T cells

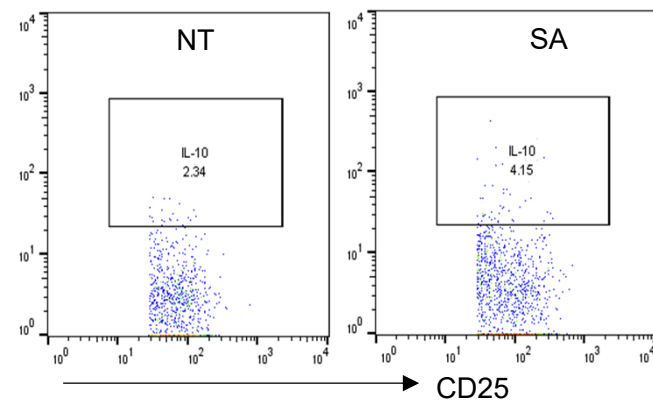

## Supplementary Fig. 2 IL-10 plays a critical role in vaccine suppression

**a)** WT mice were either treated with PBS (n=5) or SA (n=5, 3x, 3x10<sup>7</sup>CFU) and splenocytes (pooled, n=5, 1x10<sup>6</sup>) were isolated on D7 post-SA exposure and were stimulated with either IsdB (10 µg/ml) or HKB (1:10). After 60 h of stimulation, culture supernatants were analyzed for IL-10.

**b)** Naïve (n=10 for Alum and n=9 for AIsdB) or SA-exposed mice were vaccinated with AIsdB with (n=10) or without anti-IL-10 MAb (n=10) before and after vaccination, then challenged with SA (n=9-10 per group). SA-Alum, n=9.

**c)** Experimental setting, and gating strategy for the measurement of IL-10 expression by adaptive immune cells. Vert-X mice were left untreated (NT) or exposed to SA (3x10<sup>7</sup>CFU), then challenged with SA. *eGFP* (IL-10) expression in splenocytes was analyzed by flow cytometry after 20 h.

Data were from one to two independent experiments with each data point representing one mouse in **b**. The data is presented as mean ± SD of biological replicates., except in **a** ( data is presented as mean ± SD of five technical replicates). The data in **a** was analyzed by two-tailed non-parametric Mann-Whitney T test, and the data in **b** by Kruskal-Wallis non-parametric one-way ANOVA test. \*p<0.05, \*\*p<0.001. D, day. HKB, heat-killed bacteria. SA, *Staphylococcus aureus*. WT-wild-type. Source data are provided as Source Data File. . Mouse image was created by BioRender (Created in BioRender. Hajam, I. (2024) <https://BioRender.com/a18v205>).

**a)** Vert-X mice

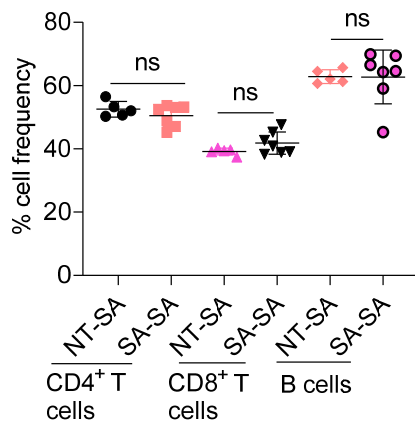

**b)** IL-10 ELISPOT, lsdB stim.

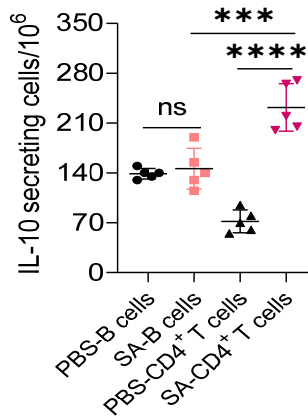

**c)** IL-10 conc. post-vaccination, lsdB stim.

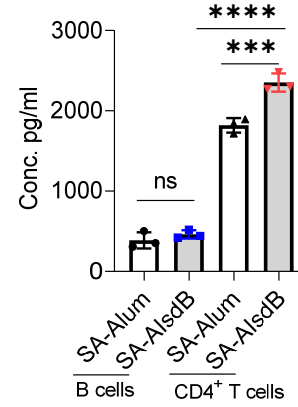

**d)** SA-CD4<sup>+</sup> T cells → recipient with aIL10 + Vax

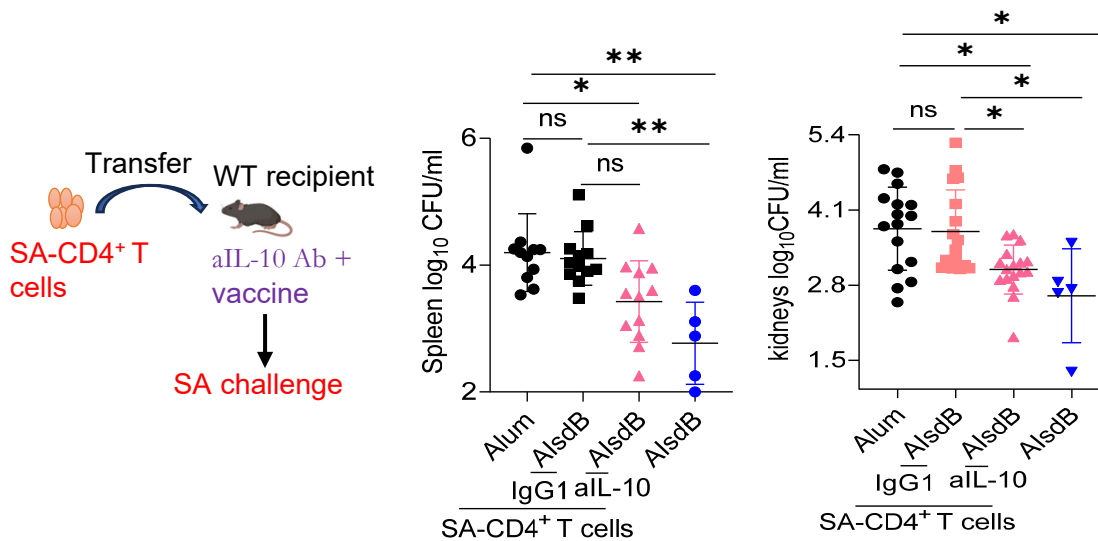

**e)** aCD25 or aCD69 Ab + vaccine

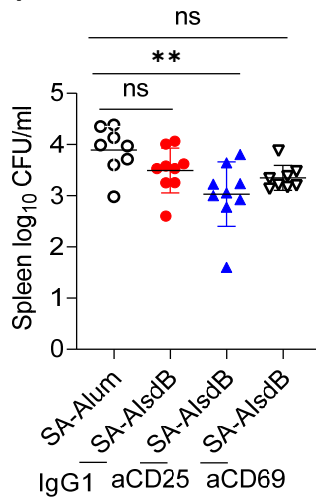

### Supplementary Fig. 3 CD4<sup>+</sup>CD25<sup>+</sup> IL-10<sup>+</sup> T cells, induced by SA exposure, mediate blunting of IsdB vaccine efficacy

**a)** Percentage of splenic CD4<sup>+</sup> T, CD8<sup>+</sup> T and B220<sup>+</sup> B cells in naïve (n=5) or SA-exposed (n=7) Vert-X mice assessed as in **Supplementary Fig. 2c**.

**b)** Purified B or CD4<sup>+</sup> T cells (1x10<sup>5</sup>) from PBS or SA-exposed (3x, 3x10<sup>7</sup>CFU) WT mice were stimulated with IsdB antigen (10µg/ml) for 40 h, followed by detection of IL-10 by an ELISPOT assay (n=5 per group).

**c)** Pooled purified B (n=5) or CD4<sup>+</sup> T cells (n=5) from Alum or AIsdB SA-exposed vaccinated mice were stimulated with IsdB (10 µg/ml) for 60 h, followed by IL-10 measurement from supernatants.

**d)** CD4<sup>+</sup> T cells were isolated from SA-exposed mice and transferred into naïve mice. The recipient mice (n=17) were vaccinated in the presence of anti-IL10 Mab or isotype control (on day before and day of vaccination), then challenged with SA as in main **Fig. 1a**. For SA-CD4<sup>+</sup> T Alum, n= 16, and n=5 in AIsdB.

**e)** SA-exposed WT mice were depleted of either CD25<sup>+</sup> (n=9) or CD69<sup>+</sup> (n=8) T cells, vaccinated one day after, then SA challenged (n=8-9 per group). SA-Alum, n=8; SA-AIsdB (IgG1), n=9)

Data were from one to three independent experiments with each data point representing one mouse, except in **c**.

The data is presented as mean ± SD of biological replicates., except in **c** (pooled data from five mouse represented as mean ± SD of three technical replicates). Data in **a-c** were analyzed by one-way ANOVA with Tukey's posthoc

test, while the data in **d-e** were analyzed by Kruskal-Wallis non-parametric one-way ANOVA test. \*p<0.05,

\*\*p<0.01, \*\*\*p<0.001, \*\*\*\*p<0.0001. ns, non-significant. a, anti. SA, *Staphylococcus aureus*. Conc.,

concentration. WT, wild-type. Mouse image was created by BioRender (Created in BioRender. Hajam, I.

(2024) <https://BioRender.com/a18v205>).

**a) MIL-10<sup>-/-</sup>**

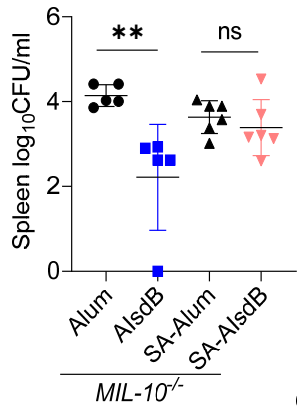

**b) CD4IL-10**

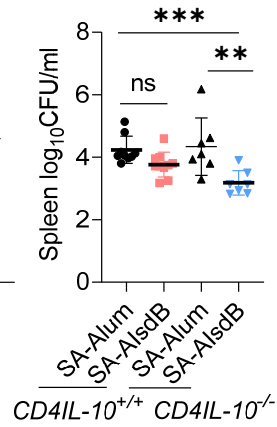

**c) CD4-IL10Rα**

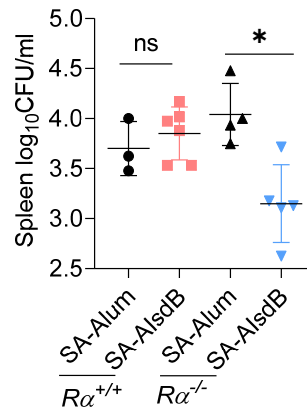

**d) Splenocytes from naïve/SA exposed**

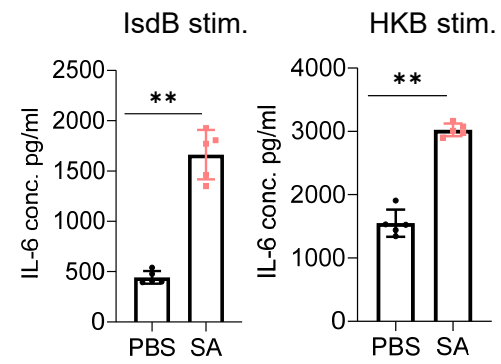

**e) aIL-6 Ab + vaccine**

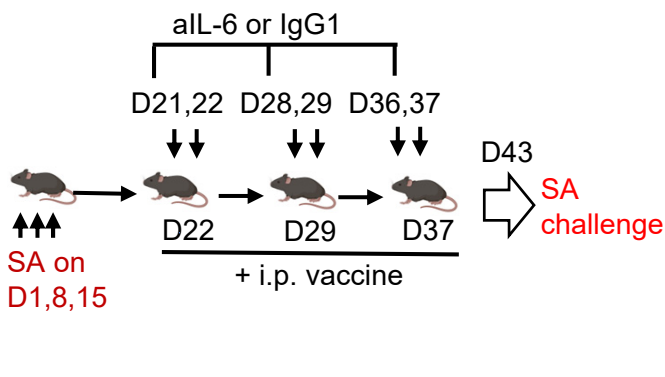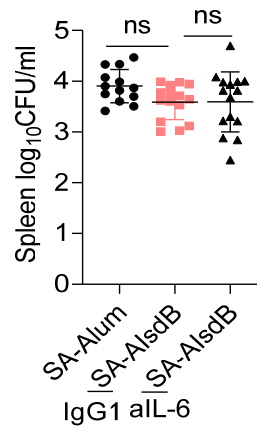



**Supplementary Fig. 4 IL-10 released by CD4<sup>+</sup> T cells contribute directly to vaccine failure via IL-10R $\alpha$  expressed on CD4<sup>+</sup> T cells.**

**a)** Naïve or SA-exposed MIL-10<sup>-/-</sup> (IL10<sup>fllox/fllox</sup> x LysM<sup>cre</sup>) were vaccinated i.p. with either Alum (naïve, n=5; SA-exposed, n=6) or AIsdB (Naïve, n=5; SA-exposed, n=6), then challenged with SA 7 dpv.

**b)** SA-exposed CD4IL-10<sup>+/+</sup> (or CD4IL-10<sup>-/-</sup>) were vaccinated i.p. with either Alum (CD4IL-10<sup>+/+</sup> n=9; CD4IL10<sup>-/-</sup>, n=7) or AIsdB (CD4IL-10<sup>+/+</sup>, n=10; CD4IL10<sup>-/-</sup>, n=7), then challenged with SA 7 dpv.

**c)** SA-exposed CD4IL10R $\alpha$ <sup>+/+</sup> and CD4IL10R $\alpha$ <sup>-/-</sup> were vaccinated i.p. with either Alum (CD4IL-10R $\alpha$ <sup>+/+</sup> n=3; CD4IL10R $\alpha$ <sup>-/-</sup>, n=4) or AIsdB (CD4IL-10R $\alpha$ <sup>+/+</sup>, n=6; CD4IL10R $\alpha$ <sup>-/-</sup>, n=5), then challenged with SA 7 dpv.

**d)** Splenocytes (pooled, n=5) from PBS- or SA-exposed (3 x 10<sup>7</sup> CFU) WT mice were stimulated with either IsdB antigen (10  $\mu$ g/ml) or HKB (1:10) *in vitro*. Cytokine IL-6 from supernatant was evaluated after 60h.

**e)** SA-exposed WT mice were treated with either isotype IgG1 control (n=15) or anti-IL-6 MAb (n=15) one day before and on the day of vaccination, then challenged with SA (n=13-15 per group). SA-Alum, n=13.

Data were from one to three independent experiments with each data point representing one mouse. The data is presented as mean  $\pm$  SD of biological replicates., except in **d** (data is presented as mean  $\pm$  SD of five technical replicates). The data in **a-c, e** were analyzed by Kruskal-Wallis non-parametric one-way ANOVA test, while the data in **d** was analyzed by two-tailed non-parametric Mann-Whitney T test. \*p<0.05, \*\*p<0.01, \*\*\*p<0.001, ns-non-significant. aIL-16, antiIL-6, dpv, days post-last vaccination. SA, *Staphylococcus aureus*. WT, wild-type. Source data are provided as Source Data File. Mouse image was created by BioRender (Created in BioRender. Hajam, I.

(2024) <https://BioRender.com/a18v205>).

**a) SA-exposed, aIL-10 effect on IL-17A or IFN- $\gamma$**

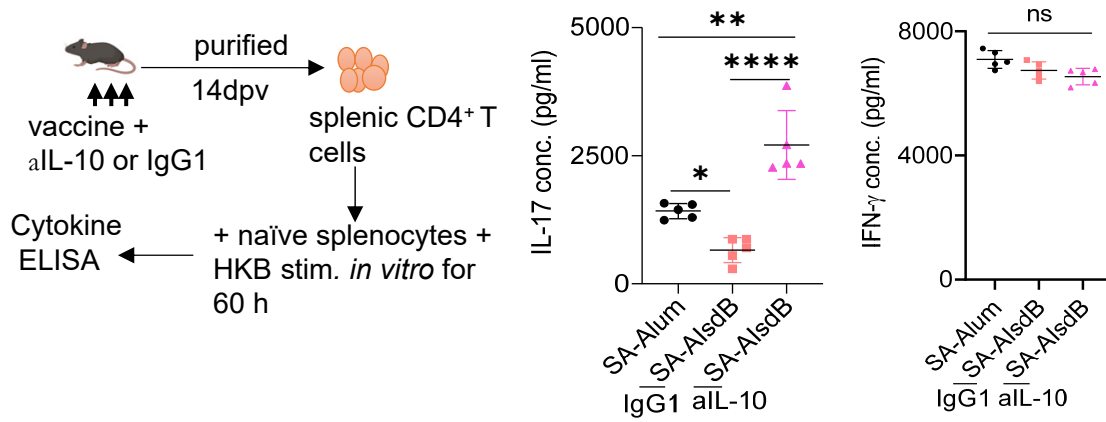

**b) adjuvant effect on IL-17A ex vivo**

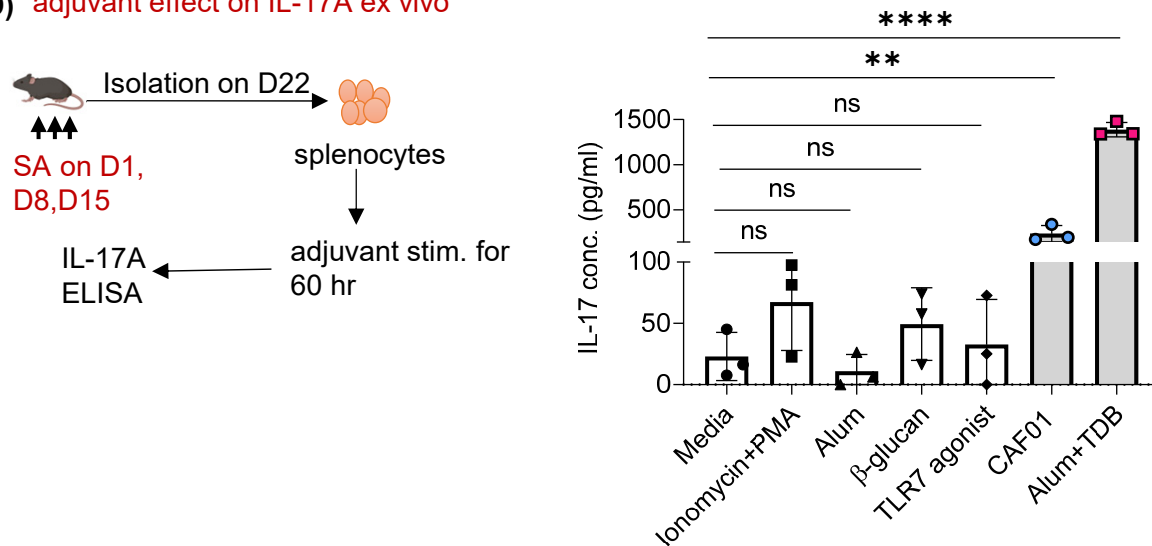

**Supplementary Fig. 5 Effect of IL-10 expressing CD4<sup>+</sup> T cell imprints on IL-17A, and the impact of adjuvants**

**a)** SA-exposed WT mice were treated with either isotype IgG1 control or anti-IL-10 MAb one day before and on the day of AIsdB vaccination as in main Fig.2b. Splenic CD4<sup>+</sup> T cells were purified 14 dpv and incubated with naïve splenocytes plus HKB (1:10). After 60h, supernatants were assayed for IL-17A and IFN- $\gamma$  (n=5 per group).

**b)** Splenocytes were isolated from WT mice exposed to SA 7 days after the last SA exposure. The cells were stimulated with various adjuvants (10  $\mu$ g/well) *in vitro* and IL-17A analysis was performed from supernatants after 60h (pooled, n=5 per group).

Data were from one experiment with each data point representing one mouse in **a** and each dot in **b** is a technical replicate. The data is presented as mean  $\pm$  SD of biological replicates in **a** while in **b** data is presented as mean  $\pm$  SD of three technical replicates of one independent experiment. The data were analyzed by one-way ANOVA with Tukey's post-hoc test. \*p<0.05, \*\*p<0.01, \*\*\*\*p<0.0001, ns-non-significant. HKB, heat-killed bacteria. aIL-10, antiIL-10. SA, *Staphylococcus aureus*. WT, wild-type. Source data are provided as Source Data File. Mouse image was created by BioRender (Created in BioRender. Hajam, I. (2024) <https://BioRender.com/a18v205>).

**a) Naïve, CAF01**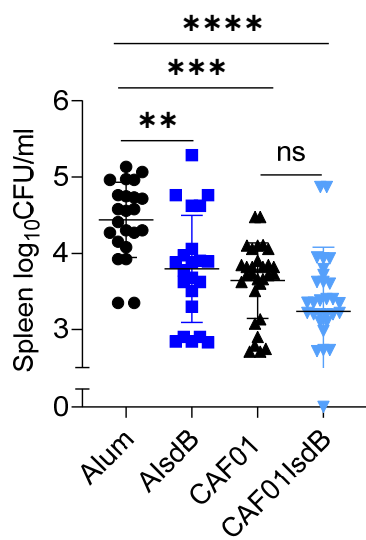**b) SA-exposed, CAF01**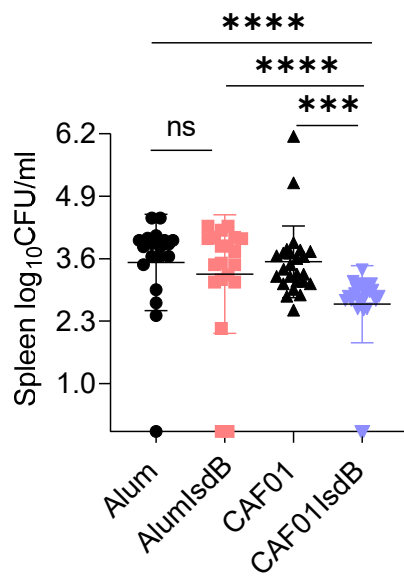**c) Naïve and SA-exposed, TDB**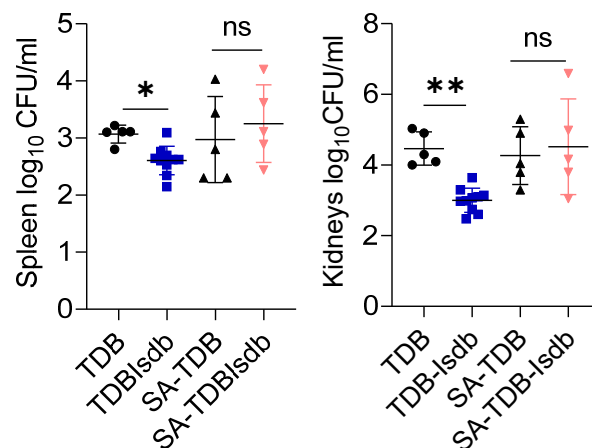**d) Naïve, ATDB**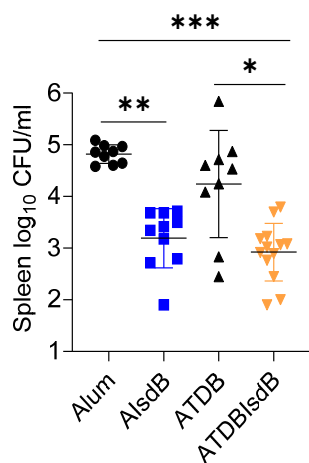**e) SA-exposed, ATDB**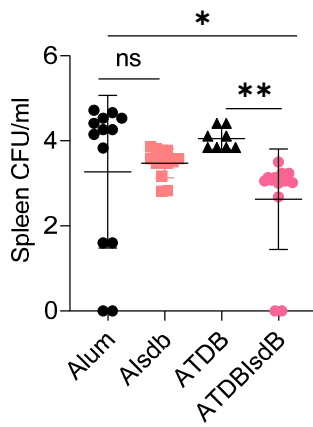**f) Naïve,  $\beta$ -glucan**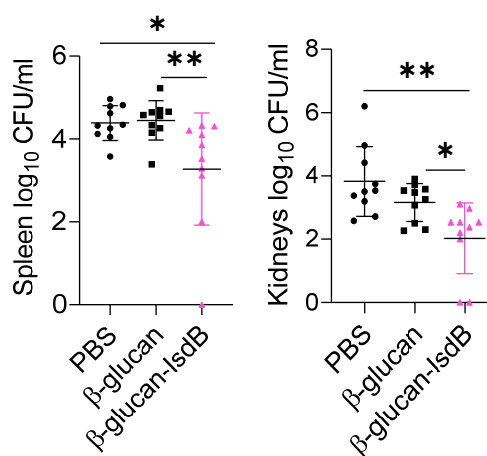**g) SA-exposed,  $\beta$ -glucan**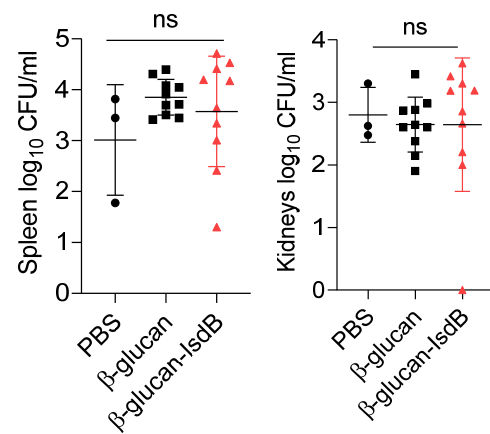**h) Naïve or SA-exposed, TLR7**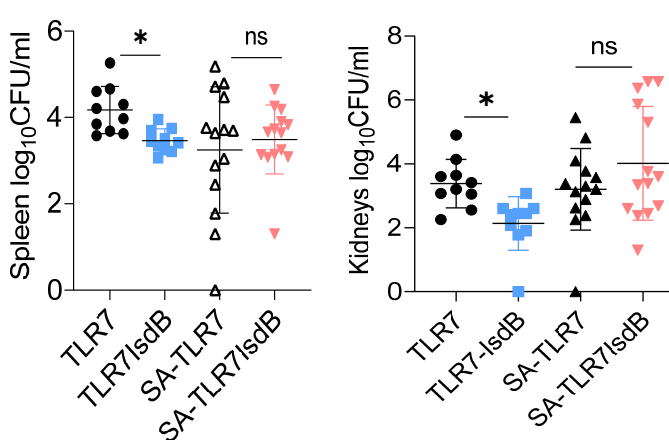

**Supplementary Fig. 6 High potency IL-17A adjuvants restore vaccine protection in SA-exposed mice.**

**a, b**) Naïve (**b**) or SA-exposed WT mice (**c**) were vaccinated i.p. with Alum (n=23 in naïve and n=19 in SA-exposed), AIsdB (n=22 in naïve and n=20 in SA-exposed), CAF01 (n=30 in naïve and n=25 in SA-exposed) or CAF01IsdB (n=32 in naïve and n=26 in SA-exposed), followed by SA challenge 14 dpv.

**c**) Naïve and SA-exposed WT mice were vaccinated i.p. with TDB alone (n=5 in naïve and n=5 in SA-exposed) or TDBIsdB (n=10 in naïve and n=5 in SA-exposed), then challenged with SA 14 dpv (n=5-10 per group).

**d, e**) Naïve (**d**) or SA-exposed WT mice (**e**) were vaccinated i.p. with Alum (n=9 in naïve and n=13 in SA-exposed), AIsdB (n=10 in naïve and n=13 in SA-exposed), AlumTDB (ATDB) (n=9 in naïve and n=8 in SA-exposed) or ATDBIsdB (n=13 in naïve and n=13 in SA-exposed), followed by SA challenge 14 dpv.

**f, g**) Naïve (**f**, n=10/group) or SA-exposed WT mice (**g**) were vaccinated i.p. with  $\beta$ -glucan (n=10 in SA-exposed) or  $\beta$ -glucanIsdB (n=10 in SA-exposed), then SA challenged on 14 dpv. PBS, n=3 in **g**..

**h**) Naïve (n=10/group) or SA-exposed WT mice (n=14/group) were vaccinated i.p. with TLR7 agonist or or TLR7 agonist plus IsdB or , followed by SA challenge on 14 dpv.

Data were from one to 4 independent experiments with each data point representing one mouse. The data is presented as mean  $\pm$  SD of biological replicates. The data were analyzed by Kruskal-Wallis non-parametric one-way ANOVA test. \*p<0.05, \*\*p<0.01, \*\*\*p<0.001, \*\*\*\*p<0.0001. ns-non-significant. SA, dpv, days post-last vaccination. *Staphylococcus aureus*. WT, wild-type. Source data are provided as Source Data File.

**a) SA-exposed, Ptx**

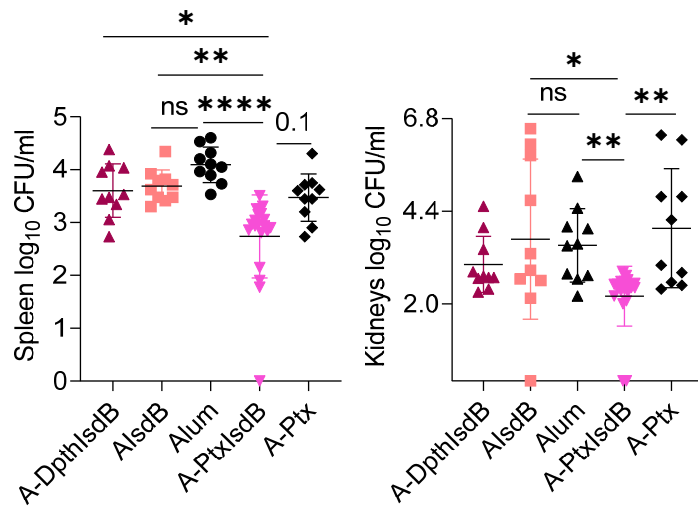

**b) Naïve, Ptx**

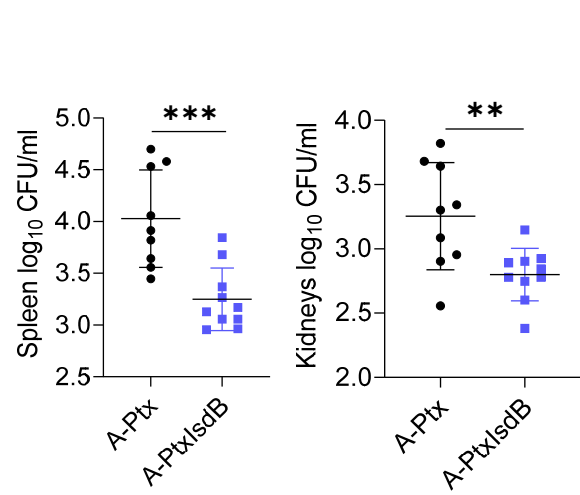

**c)**

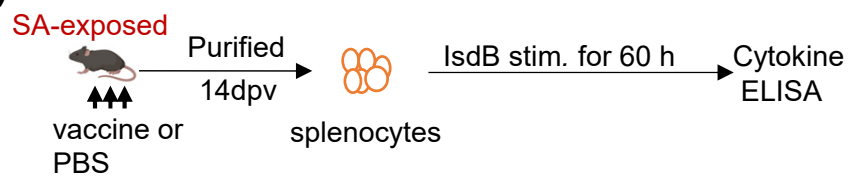

SA-exposed, effect of adjuvants on TNF, IFN- $\gamma$  and IL-10 ex-vivo

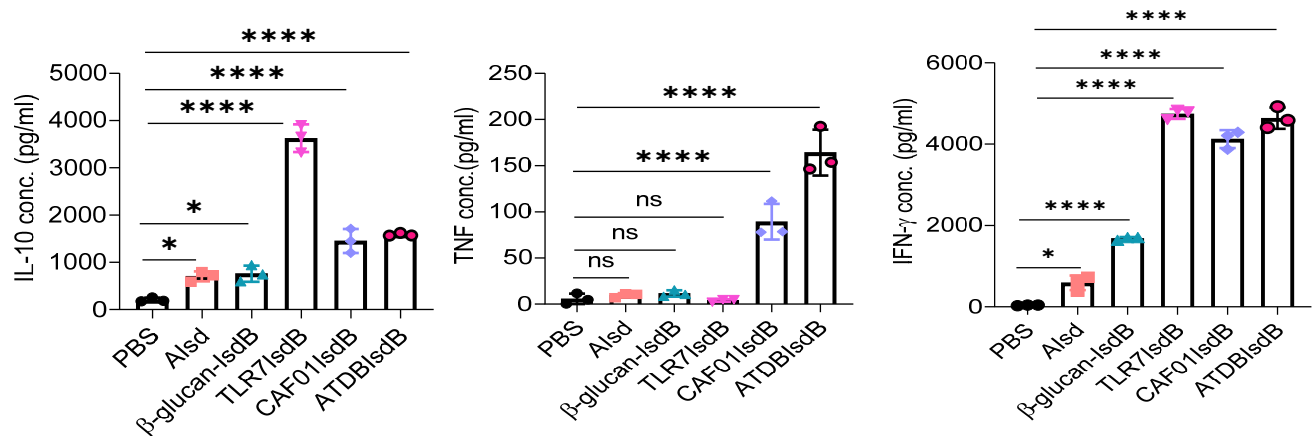

**d) SA-exposed, Ptx effect on IL-17A and IL-10**

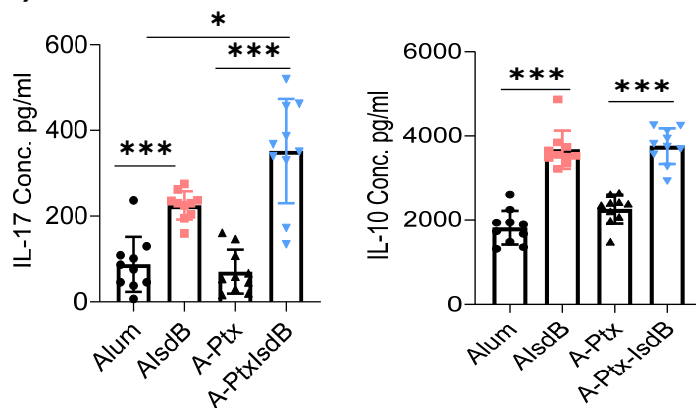

### Supplementary Fig. 7 IL-17A responses correlate with vaccine protection in SA-exposed mice

**a)** SA-exposed WT mice were vaccinated i.p. with Alum (n=10), AIsdB (n=10), Alum-diphtheria toxoid-IsdB (A-DpthIsdB, n=10) or A-PtxIsdB (n=20), then challenged with SA 14 dpv.

**b)** Naïve WT mice were vaccinated i.p. with A-Ptx (n=9) or A-PtxIsdB (n=10), then SA challenged 14 dpv.

**c)** SA-exposed ( $3 \times 10^7$  CFU) WT mice were vaccinated i.p. with either PBS or IsdB plus adjuvant. Splenocytes (pooled from three mice) purified on 14 dpv were stimulated with IsdB (10 µg/ml), and culture supernatants were analyzed for IL-17A after 60h.

**d)** SA-exposed WT mice were vaccinated i.p. with Alum, AIsdB, Alum-pertussis toxoid (A-Ptx) or A-PtxIsdB. Splenocytes purified on 14 dpv were stimulated with IsdB (10 µg/ml), and culture supernatants were analyzed for IL-17A after 60h (n=10 per group).

Data were from one to 3 independent experiments with each data point representing one mouse, except in **c**. The data is presented as mean  $\pm$  SD of biological replicates, except in **c** (data is presented as mean  $\pm$  SD of three technical replicates of one independent experiment and repeated twice with similar results). The data in **a,d** was analyzed by Kruskal-Wallis non-parametric one-way ANOVA test, data in **b** by two-tailed non-paired Mann-Whitney T test, while the data in **c** by one-way ANOVA with Tukey's post-hoc test, \* $p < 0.05$ , \*\* $p < 0.01$ , \*\*\* $p < 0.001$ , \*\*\*\* $p < 0.0001$  ns-non-significant. dpv, days post-last vaccination. Ptx, pertussis toxoid. SA, *Staphylococcus aureus*. WT, wild-type. Source data are provided as Source Data File. Mouse image was created by BioRender (Created in BioRender. Hajam, I. (2024) <https://BioRender.com/a18v205>).

**a) Naive, serum transfer**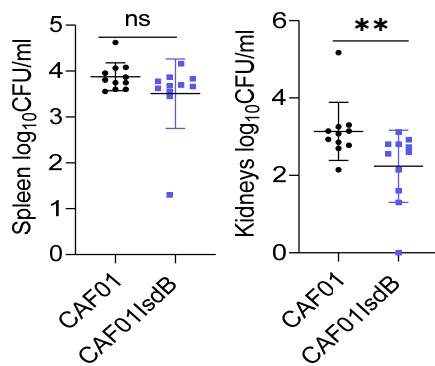**b) SA-exposed, serum transfer**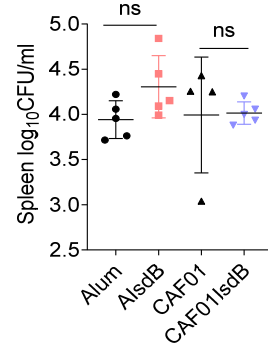**c) SA-exposed, serum IgG titers**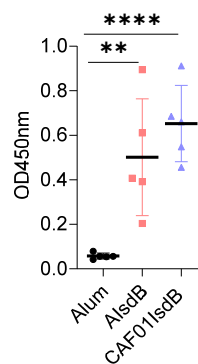**d) SA-exposed, *muMt* mice**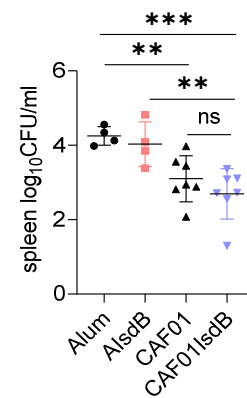**e) SA-exposed, CD3<sup>+</sup> T cell transfer**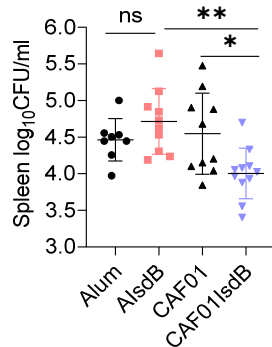**f) SA-exposed, CD4<sup>+</sup> T cells transfer**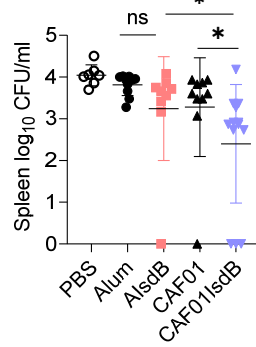**g) SA-exposed, CD4<sup>+</sup> T cells transfer**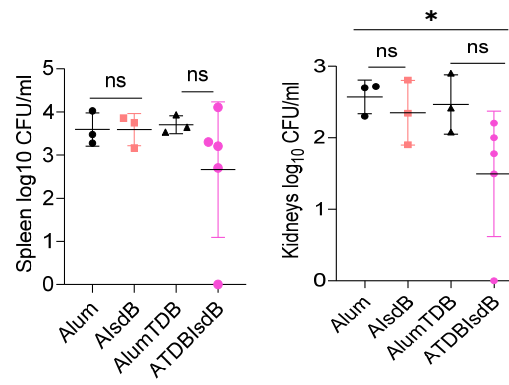**h) Gating strategy for intracellular cytokine staining**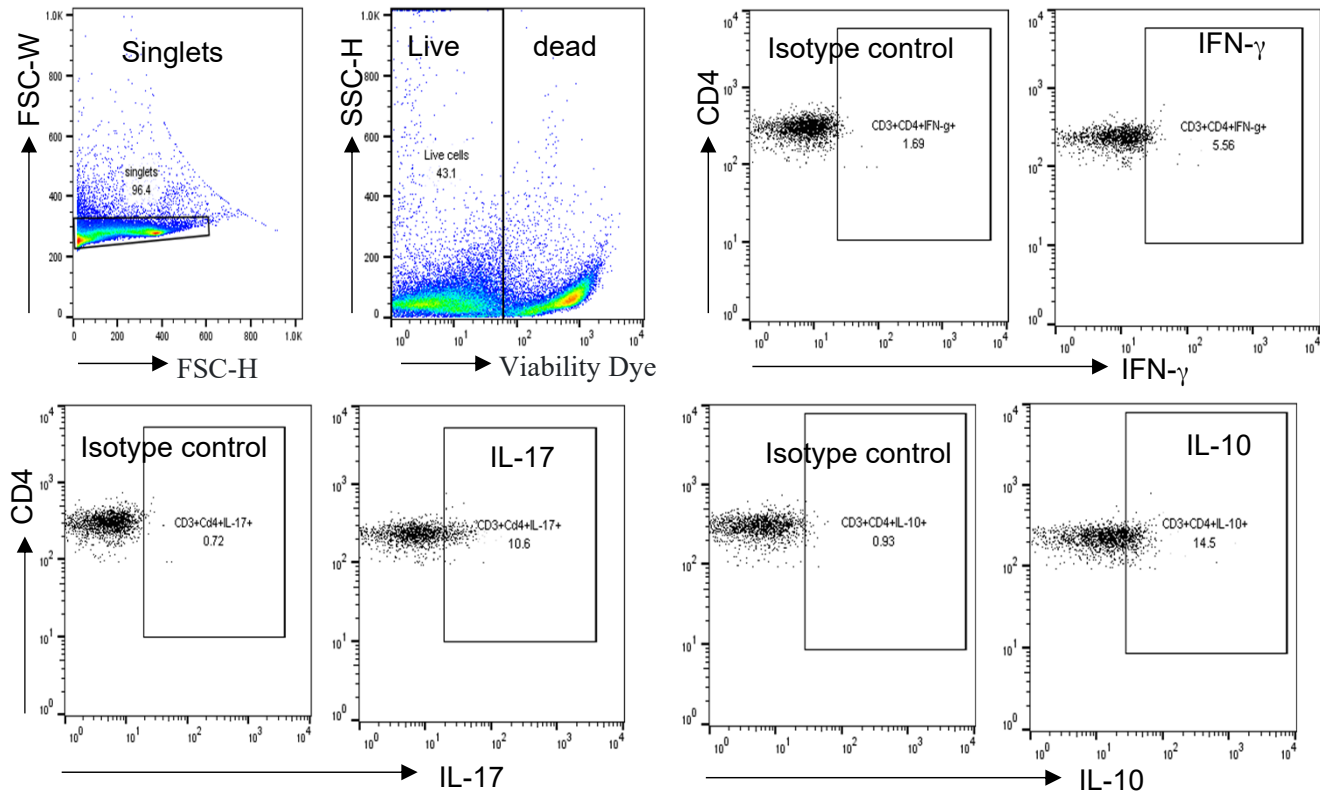

**Supplementary Fig. 8 Th17 adjuvants induce vaccine protection in SA-exposed mice that is CD4<sup>+</sup> T cell dependent.**

**a, b)** Serum (150 µl) collected 14dpv of naïve (**a**, n=10 per group) or SA-exposed (**b**, n=5 per group, except in Alum where n=4) WT mice was transferred i.v. into naïve recipient mice. After 20h, the mice were challenged with SA.

**c)** IgG titers (diluted 1:100000) of serum collected 14 dpv from SA-exposed vaccinated mice (n=5 per group).

**d)** SA-exposed *muMT*<sup>-</sup> mice were vaccinated i.p. with Alum (n=3), AIsdB (n=4), CAF01 (n=7) or CAF01IsdB (n=7), then SA challenged 14 dpv.

**e, f)** SA-exposed WT mice were vaccinated i.p. with Alum (n=8 in **e** and n=10 in **f**), AIsdB (n=10 in **e** and n=9 in **f**), CAF01 (n=8 in **e,f**) or CAF01IsdB (n=11 in **e** and n=13 in **f**). 14 dpv, splenic CD3<sup>+</sup> T cells (**e**) or CD4<sup>+</sup> T cells (**f**) were isolated and i.v. transferred into naïve WT mice, followed by SA challenge of the recipient mice after 20 h. PBS, n=7 in **f**.

**g)** SA-exposed WT mice were vaccinated i.p. with Alum (n=3), AIsdB (n=3), ATDB (n=3 or ATDBIsdB (n=4). 14 dpv, splenic CD4<sup>+</sup> T cells were isolated and transferred i.v. into naïve WT mice, followed by SA challenge of the mice after 20 h.

**h)** Gating strategy for the detection of intracellular cytokines.

Data were from one to two independent experiments with each data point representing one mouse. The data is presented as mean ± SD of biological replicates. The data were analyzed by one-way ANOVA with Tukey's post-hoc test. \*p<0.05, \*\*p<0.01, \*\*\*p<0.001, \*\*\*\*p<0.0001, ns-non-significant. SA, dpv, days post-last vaccination.

*Staphylococcus aureus*. WT-wild-type. Source data are provided as Source Data File.



**a) SA-exposed, splenocyte restimulation with IsdB**

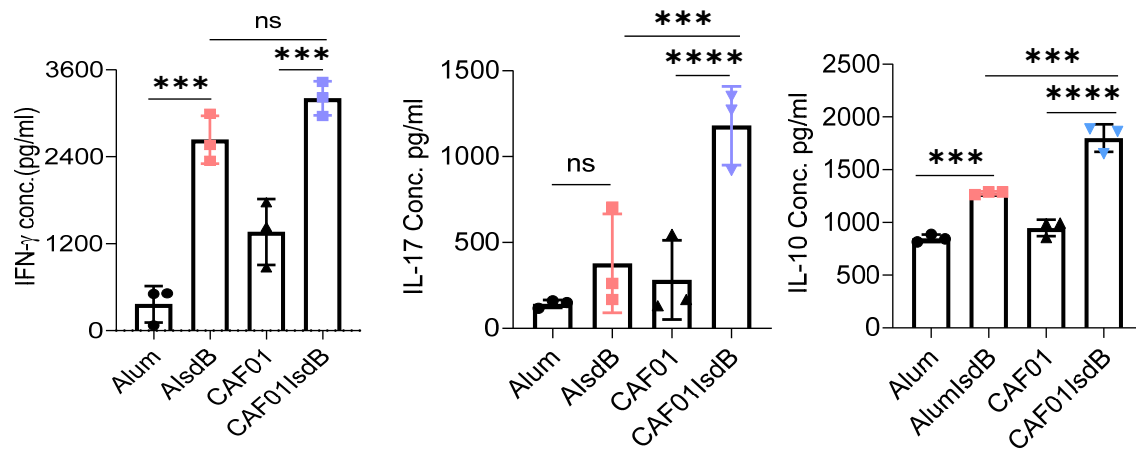

**b) SA-exposed, aIFN- $\gamma$**

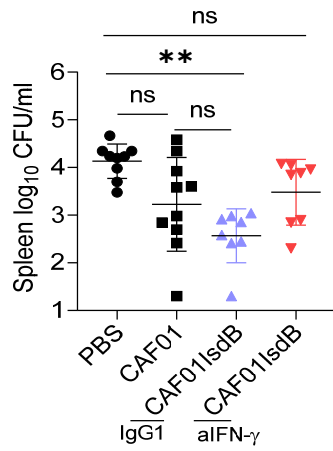

**c) SA-exposed, *IL17A*<sup>-/-</sup>**

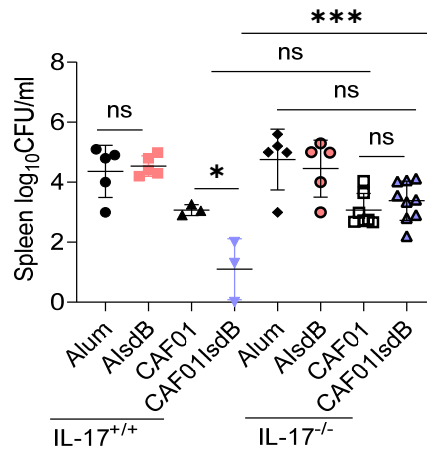

**d) SA-exposed, aIL-17A**

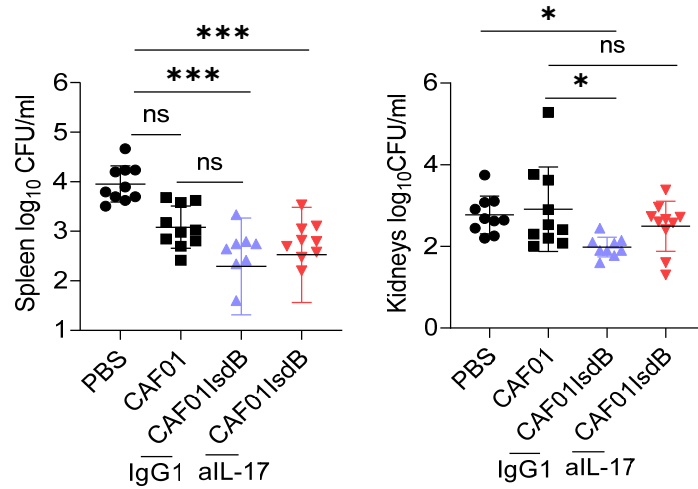

**Supplementary Fig. 9 CAF01 adjuvant induces IL-17A and IFN- $\gamma$  dependent protection in SA-exposed mice.**

**a)** SA-exposed WT mice were vaccinated i.p. with Alum, AIsdB, CAF01 or CAF01IsdB. 14 dpv, splenocytes ( $1 \times 10^6$ , n=5, pooled) were isolated and stimulated with IsdB antigen (10  $\mu$ g/ml) for 60 h, and cytokines from culture supernatants were analyzed. Data is presented as mean  $\pm$  SD of three technical replicates of one experiment and the experiment was repeated twice.

**b)** SA-exposed WT mice were vaccinated i.p. with CAF01 (n=10) or CAF01IsdB. 30 dpv, the mice were treated with an isotype IgG1 control (n=8) or anti-IFN- $\gamma$  MAb (n=8) one day before and on the day of SA challenge (n=8-10 per group). PBS, n=9.

**c)** SA-exposed WT or IL-17<sup>-/-</sup> mice were vaccinated i.p. with Alum (n=5), AIsdB (n=5), CAF01 (n=3 in WT and n=7 in ko) or CAF01IsdB (n=3 in WT and n=9 in ko), then challenged with SA 14 dpv.

**d)** SA-exposed WT mice were vaccinated i.p. with CAF01 or CAF01IsdB. 30 dpv, the mice were treated with an isotype IgG1 control or anti-IL-17A MAb one day before and on the day of SA challenge (n=10 per group, except in IgG1 control where n=9).

Data were from one to two independent experiments with each data point representing one mouse in **b-d**. The data is presented as mean  $\pm$  SD of biological replicates, except in **a**. The data in **a**, **c** was analyzed by one-way ANOVA test with Tukey's post-hoc test, while the data in **b**, **d** by Kruskal-Wallis non-parametric one-way ANOVA test. \*p<0.05, \*\*p<0.01, \*\*\*p<0.001, \*\*\*\*p<0.0001. ns-non-significant. a, anti. SA, dpv, days post-last vaccination. *Staphylococcus aureus*. WT, wild-type. Source data are provided as Source Data File.

**a)** SA-exposed, sdrE alone vaccine

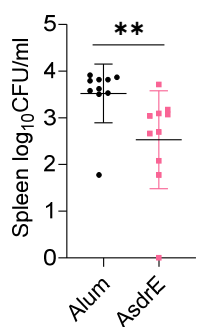

**b)** SA exposed, LAC challenge on D21

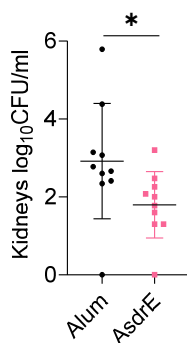

**c)** Naive, LAC challenge on D56

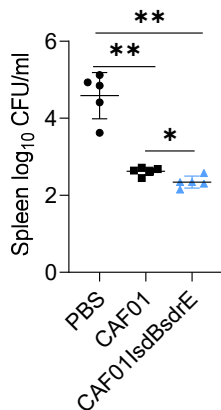

**d)** SA-exposed, LAC challenge on D56

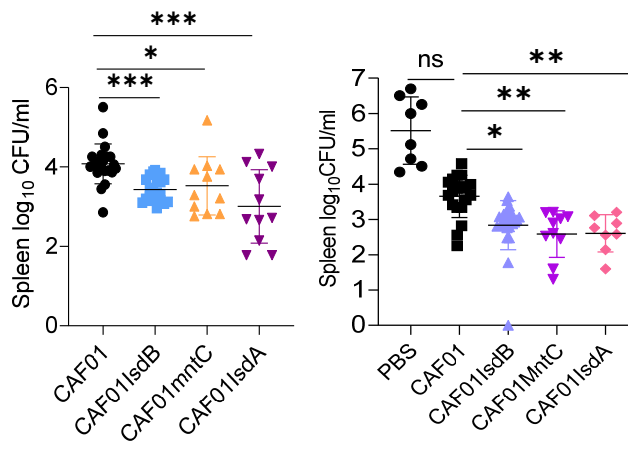

**e)** SA-exposed, LAC challenge on D85

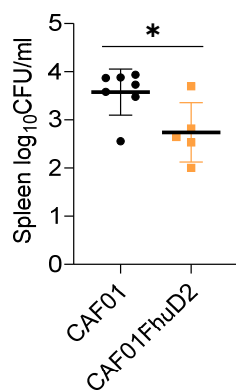

**f)** SA-exposed, Newman challenge on D85

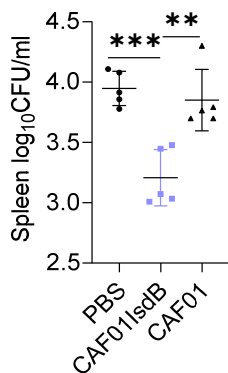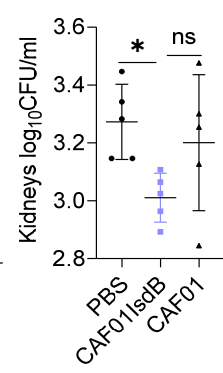

**g)** SA-exposed, SA113 challenge on D85

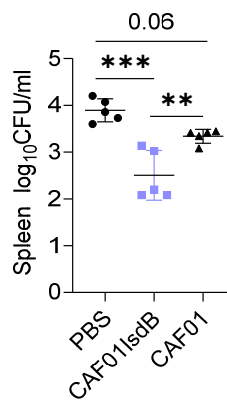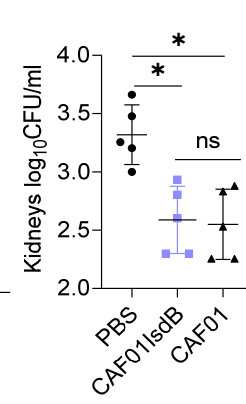

**h)** Male, SA-exposed, LAC challenge on D14

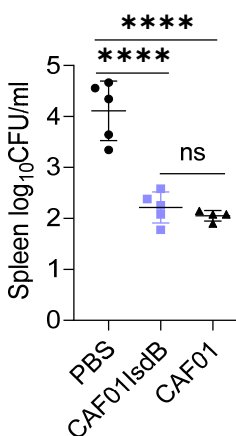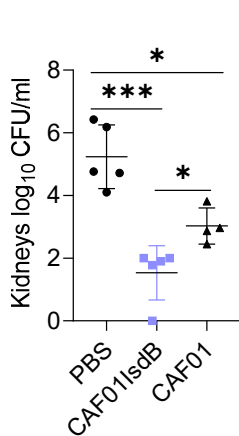

**Supplementary Fig. 10 CAF01 adjuvant induces long lasting protection against multiple strains of SA.**

**a)** SA-exposed WT mice were vaccinated i.p. with Alum or combination AIsdBsdrE vaccine, then SA challenged (n=10 per group).

**b)** SA-exposed WT mice were vaccinated i.p. with PBS, CAF01 or CAF01IsdBsdrE, then challenged with SA 21 dpv (n=5 per group).

**c, d)** Naïve (**c**) or SA-exposed WT mice (**d**, n=8-25) were vaccinated i.p. with PBS (n=8), CAF01 (n=22 in **c** and 19 in **d**), CAF01IsdB (n=23 in **c** and 25 in **d**), CAF01mntC (n=11 in **c** and 10 in **d**) or CAF01IsdA (n=11 in **c** and 8 in **d**), followed by SA challenge 56 dpv.

**e)** SA-exposed WT mice were vaccinated i.p. with CAF01 (n=7) or CAF01FhuD2 (n=5), followed by SA challenge 85 dpv.

**f, g)** SA (Newman (**f**) or SA113 (**g**)-exposed WT mice (3x, 3x10<sup>7</sup> CFU) were vaccinated i.p. with CAF01 (n=5) or CAF01IsdB (n=5), followed by challenge with the same SA strain on 85 dpv.

**h)** SA-exposed WT male mice were vaccinated i.p. with CAF01 (n=4) or CAF01IsdB (n=5), then SA challenge 14 dpv. PBS, n=5.

Data were from one to four independent experiments with each data point representing one mouse. The data is presented as mean  $\pm$  SD of biological replicates. The data in **a,e** was analyzed by two tailed non-parametric unpaired Mann-Whitney T test, data in **b,f-h** by one-way ANOVA test, while the data in **c-d** by Kruskal-Wallis non-parametric one-way ANOVA test. \*p<0.05, \*\*p<0.001, \*\*\*p<0.0001, ns-non-significant. D, day. SA, *Staphylococcus aureus*. Source data are provided as Source Data File.

**Supplementary Table 1** Antibody concentration used in flow cytometry.

| Antibody                                  | Company        | Catalog number | Dilution used for staining cells |
|-------------------------------------------|----------------|----------------|----------------------------------|
| PE anti-mouse/human CD45R/B220            | Biolegend, USA | 103208         | 1:100                            |
| APC anti-mouse CD3                        | Biolegend, USA | 100236         | 1:100                            |
| Pacific Blue anti-mouse CD4               | Biolegend, USA | 100427         | 1:100                            |
| PerCP/Cyanine5.5 anti-mouse CD4           | Biolegend, USA | 100434         | 1:100                            |
| PerCP/Cyanine5.5 anti-mouse CD8a          | Biolegend, USA | 100733         | 1:100                            |
| PE anti-mouse CD69                        | Biolegend, USA | 104508         | 1:100                            |
| Pacific Blue anti-mouse CD25              | Biolegend, USA | 102022         | 1:100                            |
| PE/Cyanine7 anti-mouse IL-10              | Biolegend, USA | 505026         | 1:50                             |
| PE anti-mouse IL-17A                      | Biolegend, USA | 506903         | 1:50                             |
| PerCP/Cyanine5.5 anti-mouse IFN- $\gamma$ | Biolegend, USA | 505822         | 1:50                             |
| PE/Cyanine7 Rat IgG2b                     | Biolegend, USA | 400617         | 1:50                             |
| PE Rat IgG1                               | Biolegend, USA | 400407         | 1:50                             |
| PerCP/Cyanine5.5 Rat IgG1                 | Biolegend, USA | 400425         | 1:50                             |
